# Supplementary material for: Resistance to antihypertensive treatment and long‐term risk: The Atherosclerosis Risk in Communities study
Source: PubMed Central journal article supplement — J Clin Hypertens (Greenwich). 2021 Sep 21;23(10):1887–96. doi: 10.1111/jch.14269 (PMC8678845; doi:10.1111/jch.14269), 2021-09-21
Supplement: JCH-23-1887-s001.pdf [file JCH-23-1887-s001.pdf]

**Resistance to Antihypertensive Treatment and Long-Term Risk:  
the Atherosclerosis Risk in Communities (ARIC) study**

Supplementary Tables S1 – S6

| <b>Traditional BP goal (&lt;140/90 mmHg)</b> | <b>Events<br/>Event rate</b>       | <b>Unadjusted HR (95% CI)<br/>P value</b> | <b>Adjusted* HR (95 % CI)<br/>P value</b> |
|----------------------------------------------|------------------------------------|-------------------------------------------|-------------------------------------------|
| <b>No HT<br/>n=5029</b>                      | <b>467 events<br/>5.1/1000 py</b>  | <b>0.58 (0.50-0.67)<br/>P&lt;0.001</b>    | <b>0.70 (0.60-0.81)<br/>P&lt;0.001</b>    |
| <b>Controlled HT<br/>n=2306</b>              | <b>332 events<br/>8.6/1000 py</b>  | <b>Ref.<br/>-</b>                         | <b>Ref.<br/>-</b>                         |
| <b>Untreated HT<br/>n=1110</b>               | <b>160 events<br/>8.8/1000 py</b>  | <b>1.04 (0.86-1.25)<br/>P=0.71</b>        | <b>1.09 (0.90-1.32)<br/>P=0.37</b>        |
| <b>Uncontrolled HT<br/>n=1034</b>            | <b>191 events<br/>11.8/1000 py</b> | <b>1.41 (1.18-1.68)<br/>P&lt;0.001</b>    | <b>1.28 (1.07-1.53)<br/>P=0.007</b>       |
| <b>Apparent resistant HT<br/>n=133</b>       | <b>28 events<br/>14.4/1000 py</b>  | <b>1.75 (1.19-2.57)<br/>P=0.005</b>       | <b>1.36 (0.92-2.01)<br/>P=0.12</b>        |
| <b>Stricter BP goal (&lt;130/80 mmHg)</b>    |                                    |                                           |                                           |
| <b>No HT<br/>n=3857</b>                      | <b>333 events<br/>4.7/1000 py</b>  | <b>0.52 (0.44-0.61)<br/>P&lt;0.001</b>    | <b>0.63 (0.53-0.75)<br/>P&lt;0.001</b>    |
| <b>Controlled HT<br/>n=1521</b>              | <b>227 events<br/>8.8/1000 py</b>  | <b>Ref.<br/>-</b>                         | <b>Ref.<br/>-</b>                         |
| <b>Untreated HT<br/>n=2282</b>               | <b>294 events<br/>7.6/1000 py</b>  | <b>0.86 (0.72-1.02)<br/>P=0.08</b>        | <b>0.91 (0.76-1.08)<br/>P=0.28</b>        |
| <b>Uncontrolled HT<br/>n=1759</b>            | <b>286 events<br/>10.1/1000 py</b> | <b>1.17 (0.98-1.39)<br/>P=0.08</b>        | <b>1.08 (0.90-1.28)<br/>P=0.41</b>        |
| <b>Apparent resistant HT<br/>n=193</b>       | <b>38 events<br/>13.1/1000 py</b>  | <b>1.53 (1.09-2.16)<br/>P=0.015</b>       | <b>1.28 (0.91-1.82)<br/>P=0.16</b>        |

Supplementary Table S1. Outcomes (first hospitalization for incident myocardial infarction, or fatal coronary heart disease) by hypertension categories. \*Adjusted for baseline age, sex, race and study center, BMI, heart rate, current smoking, eGFR, LDL, HDL, TG, and diabetes status.

| <b>Traditional BP goal (&lt;140/90 mmHg)</b> | <b>Events/persons<br/>Event rate</b> | <b>Unadjusted HR (95% CI)<br/>P value</b> | <b>Adjusted* HR (95 % CI)<br/>P value</b> |
|----------------------------------------------|--------------------------------------|-------------------------------------------|-------------------------------------------|
| <b>No HT<br/>n=5029</b>                      | <b>314 events<br/>3.4/1000 py</b>    | <b>0.67 (0.56-0.81)<br/>P&lt;0.001</b>    | <b>0.83 (0.69-1.00)<br/>P=0.05</b>        |
| <b>Controlled HT<br/>n=2306</b>              | <b>192 events<br/>4.9/1000 py</b>    | <b>Ref.<br/>-</b>                         | <b>Ref.<br/>-</b>                         |
| <b>Untreated HT<br/>n=1110</b>               | <b>123 events<br/>6.7/1000 py</b>    | <b>1.39 (1.11-1.74)<br/>P=0.004</b>       | <b>1.42 (1.13-1.79)<br/>P=0.003</b>       |
| <b>Uncontrolled HT<br/>n=1034</b>            | <b>130 events<br/>8.0/1000 py</b>    | <b>1.68 (1.34-2.10)<br/>P&lt;0.001</b>    | <b>1.44 (1.15-1.80)<br/>P=0.001</b>       |
| <b>Apparent resistant HT<br/>n=133</b>       | <b>18 events<br/>9.2/1000 py</b>     | <b>1.98 (1.22-3.22)<br/>P=0.005</b>       | <b>1.45 (0.89-2.37)<br/>P=0.13</b>        |
| <b>Stricter BP goal (&lt;130/80 mmHg)</b>    |                                      |                                           |                                           |
| <b>No HT<br/>n=3857</b>                      | <b>232 events<br/>3.2/1000 py</b>    | <b>0.70 (0.56-0.87)<br/>P=0.002</b>       | <b>0.87 (0.70-1.10)<br/>P=0.25</b>        |
| <b>Controlled HT<br/>n=1521</b>              | <b>117 events<br/>4.4/1000 py</b>    | <b>Ref.<br/>-</b>                         | <b>Ref.<br/>-</b>                         |
| <b>Untreated HT<br/>n=2282</b>               | <b>205 events<br/>5.2/1000 py</b>    | <b>1.17 (0.93-1.46)<br/>P=0.18</b>        | <b>1.24 (0.98-1.56)<br/>P=0.07</b>        |
| <b>Uncontrolled HT<br/>n=1759</b>            | <b>200 events<br/>7.0/1000 py</b>    | <b>1.60 (1.28-2.01)<br/>P&lt;0.001</b>    | <b>1.42 (1.13-1.79)<br/>P=0.003</b>       |
| <b>Apparent resistant HT<br/>n=193</b>       | <b>23 events<br/>7.8/1000 py</b>     | <b>1.83 (1.17-2.86)<br/>P=0.008</b>       | <b>1.42 (0.91-2.23)<br/>P=0.13</b>        |

Supplementary Table S2. Outcomes (first hospitalization for incident stroke) by hypertension categories.

\*Adjusted for baseline age, sex, race and study center, BMI, heart rate, current smoking, eGFR, LDL, HDL, TG, and diabetes status.

| <b>Traditional BP goal (&lt;140/90 mmHg)</b> | <b>Events/persons<br/>Event rate</b> | <b>Unadjusted HR (95% CI)<br/>P value</b> | <b>Adjusted* HR (95 % CI)<br/>P value</b> |
|----------------------------------------------|--------------------------------------|-------------------------------------------|-------------------------------------------|
| <b>No HT<br/>n=5029</b>                      | <b>687 events<br/>7.5/1000 py</b>    | <b>0.44 (0.39-0.49)<br/>P&lt;0.001</b>    | <b>0.58 (0.52-0.65)<br/>P&lt;0.001</b>    |
| <b>Controlled HT<br/>n=2306</b>              | <b>606 events<br/>16.0/1000 py</b>   | <b>Ref.<br/>-</b>                         | <b>Ref.<br/>-</b>                         |
| <b>Untreated HT<br/>n=1110</b>               | <b>256 events<br/>14.2/1000 py</b>   | <b>0.90 (0.77-1.04)<br/>P=0.14</b>        | <b>0.92 (0.79-1.07)<br/>P=0.27</b>        |
| <b>Uncontrolled HT<br/>n=1034</b>            | <b>338 events<br/>21.5/1000 py</b>   | <b>1.39 (1.22-1.59)<br/>P&lt;0.001</b>    | <b>1.21 (1.06-1.38)<br/>P=0.006</b>       |
| <b>Apparent resistant HT<br/>n=133</b>       | <b>64 events<br/>36.6/1000 py</b>    | <b>2.52 (1.95-3.26)<br/>P&lt;0.001</b>    | <b>1.83 (1.41-2.37)<br/>P&lt;0.001</b>    |
| <b>Stricter BP goal (&lt;130/80 mmHg)</b>    |                                      |                                           |                                           |
| <b>No HT<br/>n=3857</b>                      | <b>498 events<br/>7.0/1000 py</b>    | <b>0.42 (0.37-0.48)<br/>P&lt;0.001</b>    | <b>0.57 (0.49-0.65)<br/>P&lt;0.001</b>    |
| <b>Controlled HT<br/>n=1521</b>              | <b>392 events<br/>15.6/1000 py</b>   | <b>Ref.<br/>-</b>                         | <b>Ref.<br/>-</b>                         |
| <b>Untreated HT<br/>n=2282</b>               | <b>445 events<br/>11.5/1000 py</b>   | <b>0.73 (0.63-0.83)<br/>P&lt;0.001</b>    | <b>0.79 (0.69-0.90)<br/>P=0.001</b>       |
| <b>Uncontrolled HT<br/>n=1759</b>            | <b>528 events<br/>19.1/1000 py</b>   | <b>1.26 (1.10-1.43)<br/>P=0.001</b>       | <b>1.12 (0.98-1.28)<br/>P=0.09</b>        |
| <b>Apparent resistant HT<br/>n=193</b>       | <b>88 events<br/>33.3/1000 py</b>    | <b>2.32 (1.84-2.93)<br/>P&lt;0.001</b>    | <b>1.86 (1.47-2.35)<br/>P&lt;0.001</b>    |

Supplementary Table S3. Outcomes (first hospitalization for incident heart failure) by hypertension categories.

\*Adjusted for baseline age, sex, race and study center, BMI, heart rate, current smoking, eGFR, LDL, HDL, TG, and diabetes status.

| <b>Traditional BP goal (&lt;140/90 mmHg)</b> | <b>Events/persons<br/>Event rate</b> | <b>Unadjusted HR (95% CI)<br/>P value</b> | <b>Adjusted* HR (95 % CI)<br/>P value</b> |
|----------------------------------------------|--------------------------------------|-------------------------------------------|-------------------------------------------|
| <b>No HT<br/>n=5029</b>                      | <b>1866 events<br/>19.5/1000 py</b>  | <b>0.66 (0.61-0.71)<br/>P&lt;0.001</b>    | <b>0.80 (0.74-0.87)<br/>P&lt;0.001</b>    |
| <b>Controlled HT<br/>n=2306</b>              | <b>1147 events<br/>28.0/1000 py</b>  | <b>Ref.<br/>-</b>                         | <b>Ref.<br/>-</b>                         |
| <b>Untreated HT<br/>n=1110</b>               | <b>574 events<br/>29.8/1000 py</b>   | <b>1.08 (0.98-1.19)<br/>P=0.14</b>        | <b>1.04 (0.94-1.16)<br/>P=0.40</b>        |
| <b>Uncontrolled HT<br/>n=1034</b>            | <b>604 events<br/>34.9/1000 py</b>   | <b>1.30 (1.18-1.44)<br/>P&lt;0.001</b>    | <b>1.11 (1.01-1.23)<br/>P=0.039</b>       |
| <b>Apparent resistant HT<br/>n=133</b>       | <b>92 events<br/>44.4/1000 py</b>    | <b>1.75 (1.42-2.17)<br/>P&lt;0.001</b>    | <b>1.41 (1.14-1.75)<br/>P=0.002</b>       |
| <b>Stricter BP goal (&lt;130/80 mmHg)</b>    |                                      |                                           |                                           |
| <b>No HT<br/>n=3857</b>                      | <b>1374 events<br/>18.6/1000 py</b>  | <b>0.63 (0.57-0.68)<br/>P&lt;0.001</b>    | <b>0.77 (0.71-0.85)<br/>P&lt;0.001</b>    |
| <b>Controlled HT<br/>n=1521</b>              | <b>757 events<br/>27.9/1000 py</b>   | <b>Ref.<br/>-</b>                         | <b>Ref.<br/>-</b>                         |
| <b>Untreated HT<br/>n=2282</b>               | <b>1066 events<br/>26.0/1000 py</b>  | <b>0.92 (0.84-1.01)<br/>P=0.09</b>        | <b>0.95 (0.87-1.05)<br/>P=0.30</b>        |
| <b>Uncontrolled HT<br/>n=1759</b>            | <b>960 events<br/>31.9/1000 py</b>   | <b>1.18 (1.07-1.30)<br/>P=0.001</b>       | <b>1.05 (0.95-1.15)<br/>P=0.33</b>        |
| <b>Apparent resistant HT<br/>n=193</b>       | <b>126 events<br/>40.7/1000 py</b>   | <b>1.58 (1.31-1.91)<br/>P&lt;0.001</b>    | <b>1.35 (1.11-1.63)<br/>P=0.002</b>       |

Supplementary Table S4. Outcomes (death) by hypertension categories.

\*Adjusted for baseline age, sex, race and study center, BMI, heart rate, current smoking, eGFR, LDL, HDL, TG, and diabetes status.

| <b>BP ≥140/90 mmHg</b>                          | <b>Events<br/>Event rate</b>        | <b>Mean SBP (mmHg)<br/>Mean DBP (mmHg)</b> | <b>Unadjusted HR<br/>(95% CI)</b>      | <b>Adjusted* HR<br/>(95 % CI)</b>      |
|-------------------------------------------------|-------------------------------------|--------------------------------------------|----------------------------------------|----------------------------------------|
| <b>Untreated HT<br/>n=1110</b>                  | <b>706 events<br/>41.7/1000 py</b>  | <b>152±12<br/>79 ±10</b>                   | <b>Ref.<br/>-</b>                      | <b>Ref.<br/>-</b>                      |
| <b>Uncontrolled HT with 1 drug<br/>n=660</b>    | <b>451 events<br/>47.7/1000 py</b>  | <b>153±14<br/>78±11</b>                    | <b>1.17 (1.04-1.31)<br/>P=0.010</b>    | <b>1.05 (0.93-1.19)<br/>P=0.40</b>     |
| <b>Uncontrolled HT with 2 drugs<br/>n=359</b>   | <b>251 events<br/>49.8/1000 py</b>  | <b>154±13<br/>78±12</b>                    | <b>1.22 (1.05-1.41)<br/>P=0.007</b>    | <b>1.16 (1.00-1.35)<br/>P=0.046</b>    |
| <b>Uncontrolled HT with ≥ 3 drugs<br/>n=130</b> | <b>109 events<br/>70.6/1000 py</b>  | <b>157±16<br/>78±14</b>                    | <b>1.83 (1.49-2.24)<br/>P&lt;0.001</b> | <b>1.50 (1.21-1.85)<br/>P&lt;0.001</b> |
| <b>BP ≥130/80 mmHg</b>                          |                                     |                                            |                                        |                                        |
| <b>Untreated HT<br/>n=2282</b>                  | <b>1319 events<br/>36.0/1000 py</b> | <b>141±14<br/>77±9</b>                     | <b>Ref.<br/>-</b>                      | <b>Ref.<br/>-</b>                      |
| <b>Uncontrolled HT with 1 drug<br/>n=1143</b>   | <b>736 events<br/>43.0/1000 py</b>  | <b>145±15<br/>77±10</b>                    | <b>1.23 (1.12-1.35)<br/>P&lt;0.001</b> | <b>1.08 (0.98-1.18)<br/>P=0.11</b>     |
| <b>Uncontrolled HT with 2 drugs<br/>n=597</b>   | <b>410 events<br/>47.9/1000 py</b>  | <b>145±15<br/>77±11</b>                    | <b>1.38 (1.24-1.55)<br/>P&lt;0.001</b> | <b>1.28 (1.14-1.44)<br/>P&lt;0.001</b> |
| <b>Uncontrolled HT with ≥ 3 drugs<br/>n=202</b> | <b>158 events<br/>62.1/1000 py</b>  | <b>148±18<br/>76±12</b>                    | <b>1.89 (1.60-2.22)<br/>P&lt;0.001</b> | <b>1.62 (1.36-1.92)<br/>P&lt;0.001</b> |

Supplementary Table S5. Outcomes (first hospitalization for incident myocardial infarction or stroke or heart failure, or death) and baseline blood pressure levels by number of antihypertensive drug classes used, in participants with baseline blood pressure ≥140/90 mmHg, and in participants with baseline blood pressure ≥130/80 mmHg. \*Adjusted for baseline age, sex, race and study center, BMI, heart rate, current smoking, eGFR, LDL, HDL, TG, and diabetes status.

| <b>BP&lt;140/90 mmHg</b>                      | <b>Events<br/>Event rate</b>        | <b>Mean SBP (mmHg)<br/>Mean DBP (mmHg)</b> | <b>Unadjusted HR<br/>(95% CI)</b>      | <b>Adjusted* HR<br/>(95 % CI)</b>      |
|-----------------------------------------------|-------------------------------------|--------------------------------------------|----------------------------------------|----------------------------------------|
| <b>No HT<br/>n=5029</b>                       | <b>2328 events<br/>26.3/1000 py</b> | <b>118±12<br/>68±9</b>                     | <b>Ref.<br/>-</b>                      | <b>Ref.<br/>-</b>                      |
| <b>Controlled HT with 1 drug<br/>n=1436</b>   | <b>828 events<br/>35.4/1000 py</b>  | <b>122±11<br/>69±9</b>                     | <b>1.41 (1.30-1.52)<br/>P&lt;0.001</b> | <b>1.21 (1.11-1.31)<br/>P&lt;0.001</b> |
| <b>Controlled HT with 2 drugs<br/>n=716</b>   | <b>458 events<br/>42.8/1000 py</b>  | <b>122±11<br/>70±9</b>                     | <b>1.75 (1.58-1.93)<br/>P&lt;0.001</b> | <b>1.46 (1.31-1.62)<br/>P&lt;0.001</b> |
| <b>Controlled HT with ≥ 3 drugs<br/>n=172</b> | <b>127 events<br/>54.4/1000 py</b>  | <b>123±11<br/>69±10</b>                    | <b>2.33 (1.95-2.78)<br/>P&lt;0.001</b> | <b>1.73 (1.44-2.08)<br/>P&lt;0.001</b> |
| <b>BP&lt;130/80 mmHg</b>                      |                                     |                                            |                                        |                                        |
| <b>No HT<br/>n=3857</b>                       | <b>1715 events<br/>24.9/1000 py</b> | <b>114±10<br/>66±7</b>                     | <b>Ref.<br/>-</b>                      | <b>Ref.<br/>-</b>                      |
| <b>Controlled HT with 1 drug<br/>n=953</b>    | <b>543 events<br/>34.6/1000 py</b>  | <b>116±9<br/>67±8</b>                      | <b>1.45 (1.31-1.59)<br/>P&lt;0.001</b> | <b>1.26 (1.14-1.39)<br/>P&lt;0.001</b> |
| <b>Controlled HT with 2 drugs<br/>n=478</b>   | <b>299 events<br/>41.6/1000 py</b>  | <b>117±9<br/>67±8</b>                      | <b>1.80 (1.59-2.04)<br/>P&lt;0.001</b> | <b>1.45 (1.28-1.65)<br/>P&lt;0.001</b> |
| <b>Controlled HT with ≥ 3 drugs<br/>n=100</b> | <b>78 events<br/>58.4/1000 py</b>   | <b>116±9<br/>65±8</b>                      | <b>2.66 (2.12-3.33)<br/>P&lt;0.001</b> | <b>1.71 (1.36-2.17)<br/>P&lt;0.001</b> |

Supplementary Table S6. Outcomes (first hospitalization for incident myocardial infarction or stroke or heart failure, or death) and baseline blood pressure levels by number of antihypertensive drug classes used, in participants with baseline blood pressure <140/90 mmHg, and in participants with baseline blood pressure <130/80 mmHg. \*Adjusted for baseline age, sex, race and study center, BMI, heart rate, current smoking, eGFR, LDL, HDL, TG, and diabetes status.
